# Supplementary material for: Arene Ru(II) Complexes Acted as Potential KRAS G-Quadruplex DNA Stabilizer Induced DNA Damage Mediated Apoptosis to Inhibit Breast Cancer Progress
Source: MDPI journal article supplement (doi:10.3390/molecules27103046), 2022-05-10
Supplement: s1 [file s1]

## Supporting Information

# **Arene Ru(II) complexes acted as potential *KRAS* G-quadruplex DNA stabilizer induced DNA damage mediated apoptosis to inhibit breast cancer progress**

Jiayi Qian<sup>1</sup>, Ruotong Liu<sup>1</sup>, Ningzhi Liu<sup>1</sup>, Chanling Yuan<sup>1</sup>, Qiong Wu<sup>2</sup>, Yanhua

Chen<sup>1</sup>, Weijun Tan<sup>2,3,\*</sup>, and Wenjie Mei<sup>1,2,\*</sup>

1. School of Pharmacy, Guangdong Pharmaceutical University, Guangzhou

510006, China; qianjiayi0101@163.com (J.Q.); ruotongliu123@126.com (R.L.);

ganoderma0@126.com (N.L.); ycc2552@163.com (C.Y.);

amandachen423@163.com (Y.C.)

2. Guangdong Province Engineering Technology Centre for Molecular Probes

and Biomedicine Imaging, Guangzhou, 510006, China;

wuqiongniu.1113@163.com

3. School of Food Science, Guangdong Pharmaceutical University, Guangzhou,

510006, China

Correspondence: tanwj@gdpu.edu.cn (W.T.); wenjiemei@gdpu.edu.cn (W.M.)

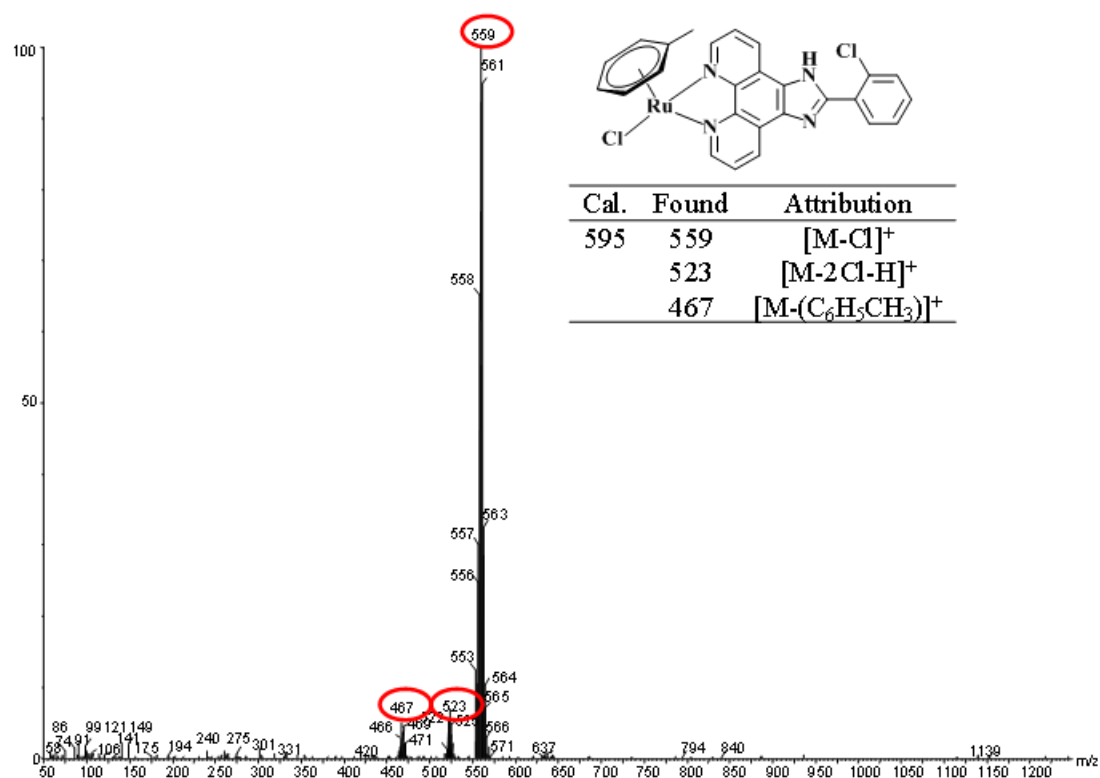

**Figure S1.** The ESI-MS spectra of complex **1**.

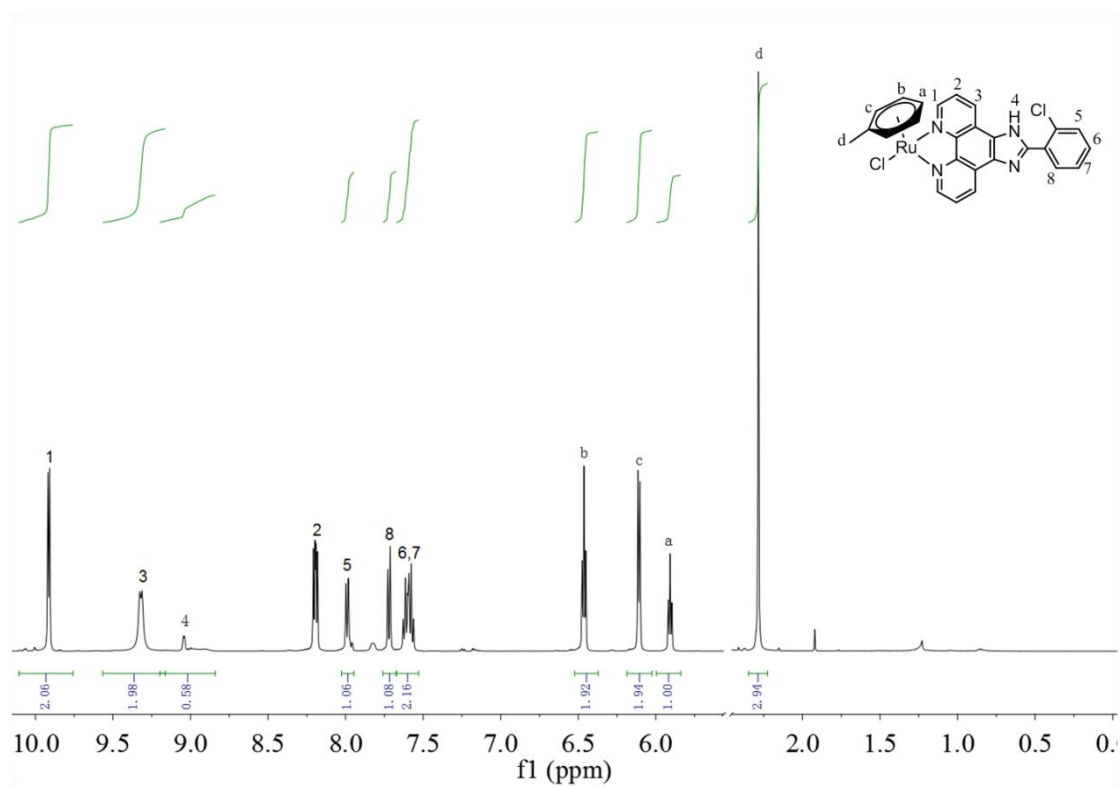

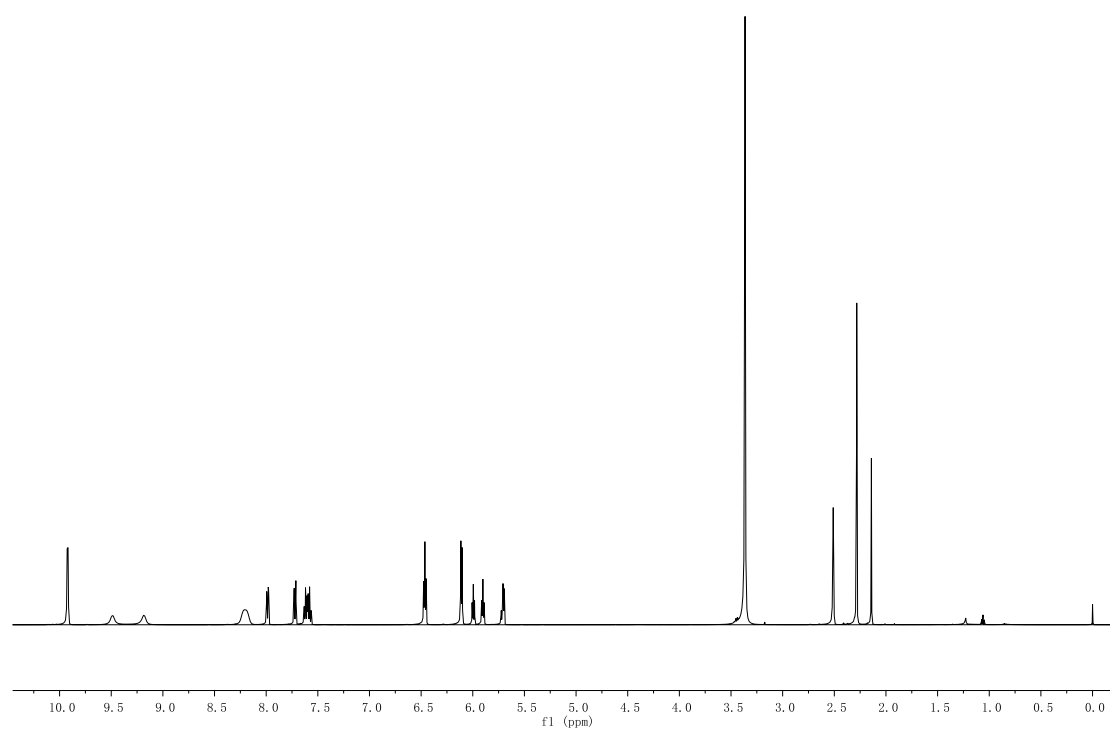

**Figure S2.** The partial enlarged view (A) and the whole view (B) of  $^1\text{H}$  NMR spectra of complex **1**.

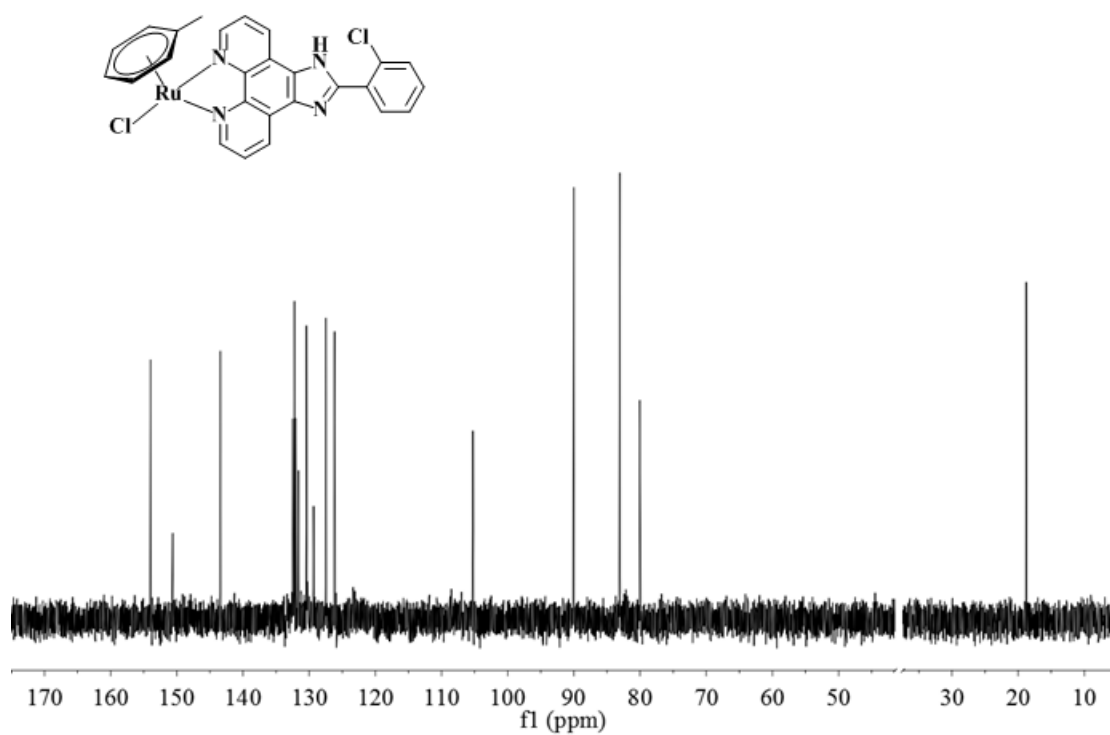

**Figure S3.** The  $^{13}\text{C}$  NMR spectra of complex **1**.

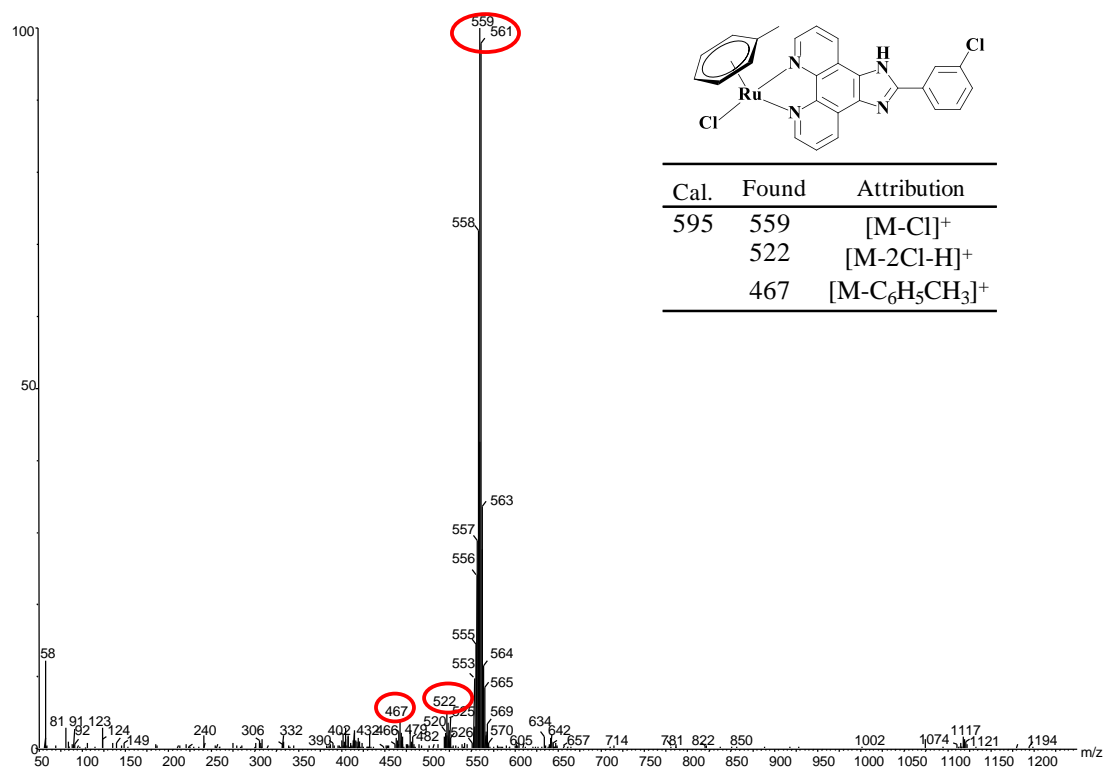

**Figure S4.** The ESI-MS spectra of complex **2**.

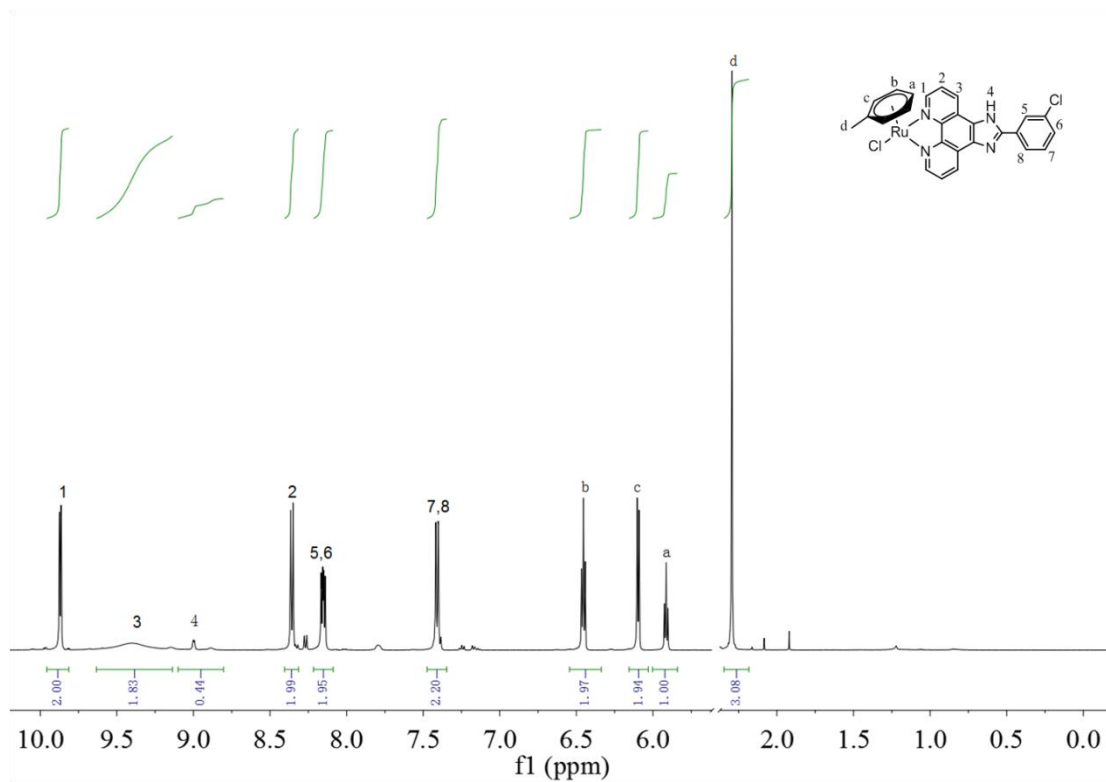

A

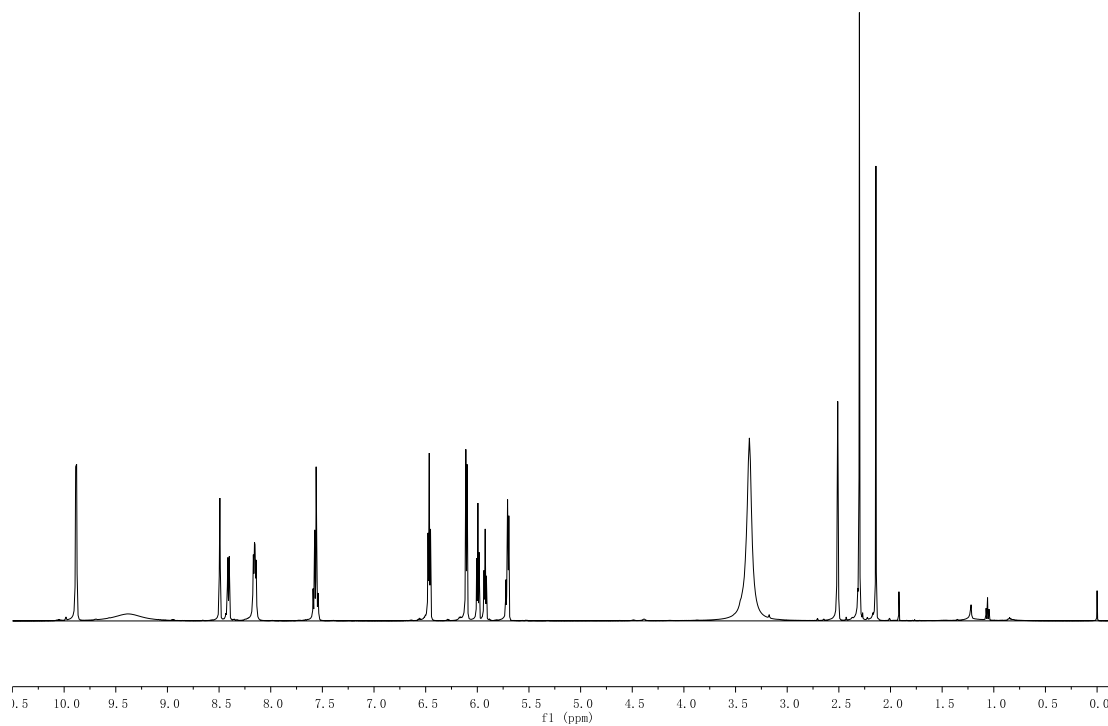

B

**Figure S5.** The partial enlarged view (A) and the whole view (B) of  $^1\text{H}$  NMR spectra of complex **2**.

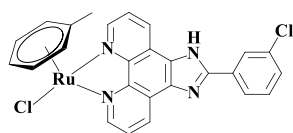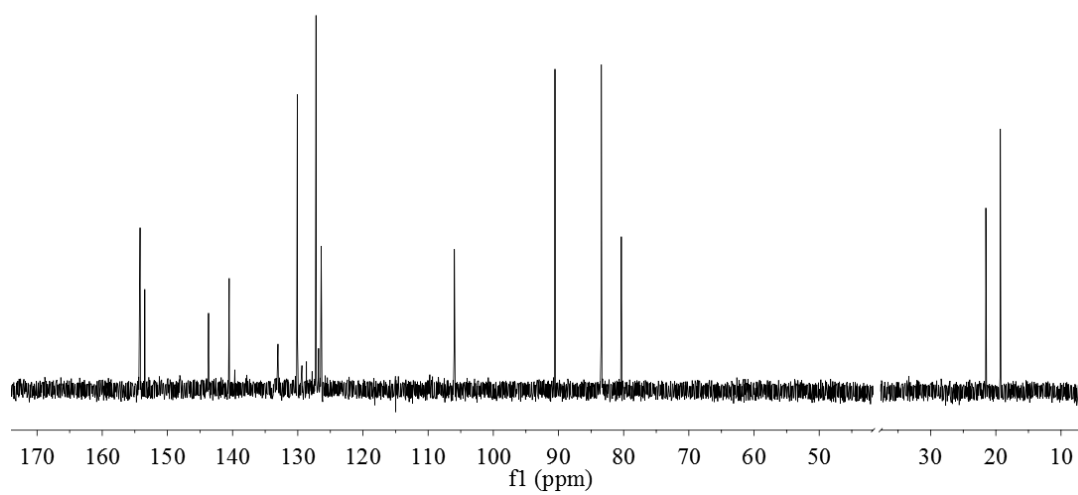

**Figure S6.** The  $^{13}\text{C}$  NMR spectra of complex **2**.

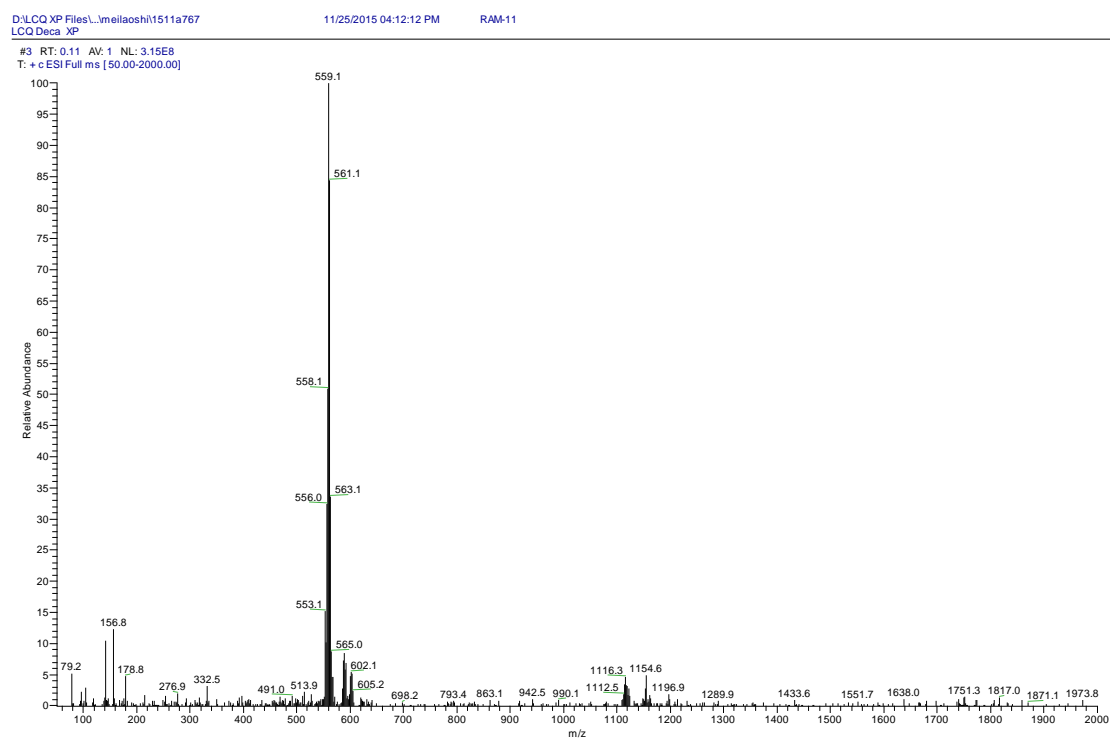

**Figure S7.** The ESI-MS spectra of complex **3**.

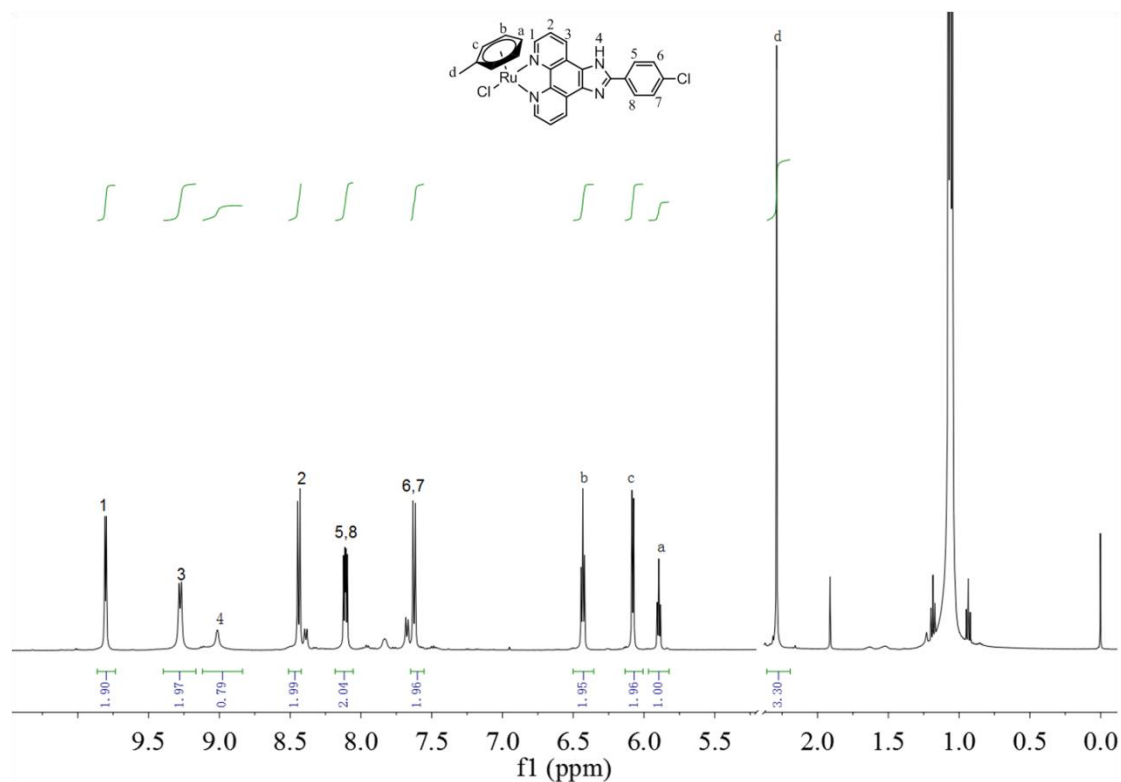

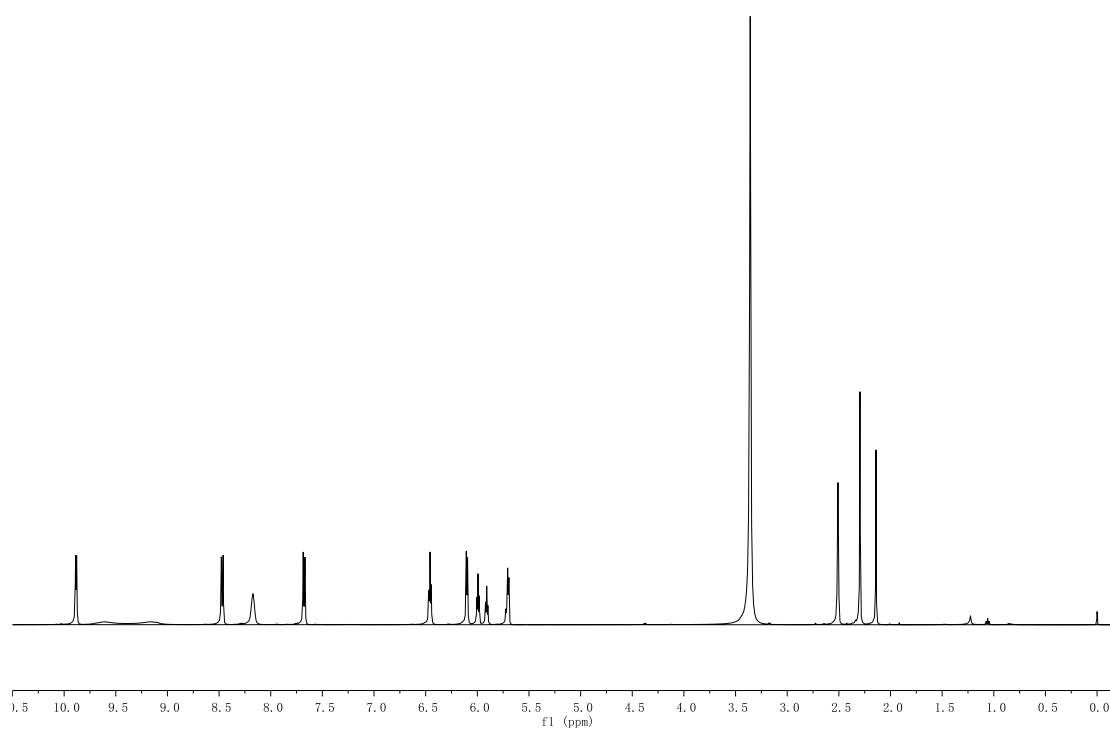

B

**Figure S8.** The partial enlarged view (A) and the whole view (B) of  $^1\text{H}$  NMR spectra of complex **3**.

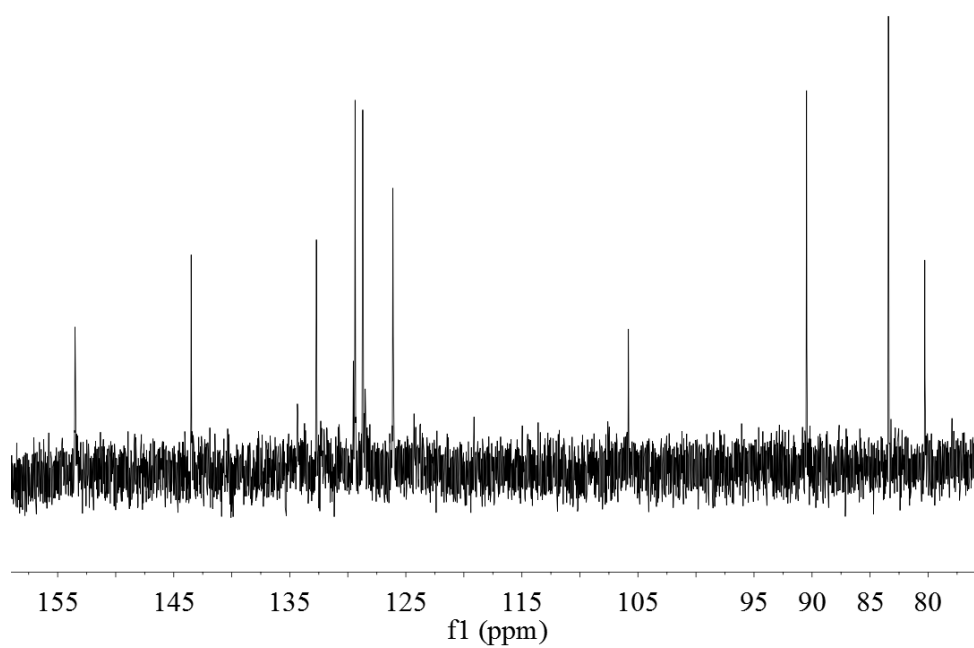

**Figure S9.** The  $^{13}\text{C}$  NMR spectra of complex **3**.

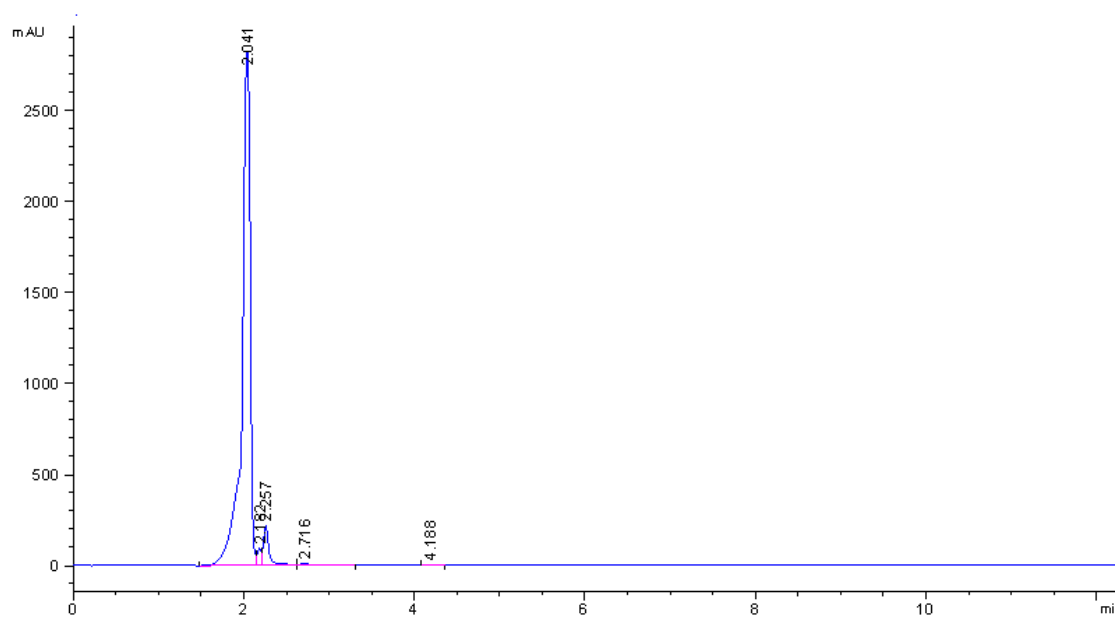

**Figure S10.** The HPCL results of complex **1**, the mobile phase is  $\text{CH}_3\text{OH}:\text{CH}_3\text{CN}=8:2$ .

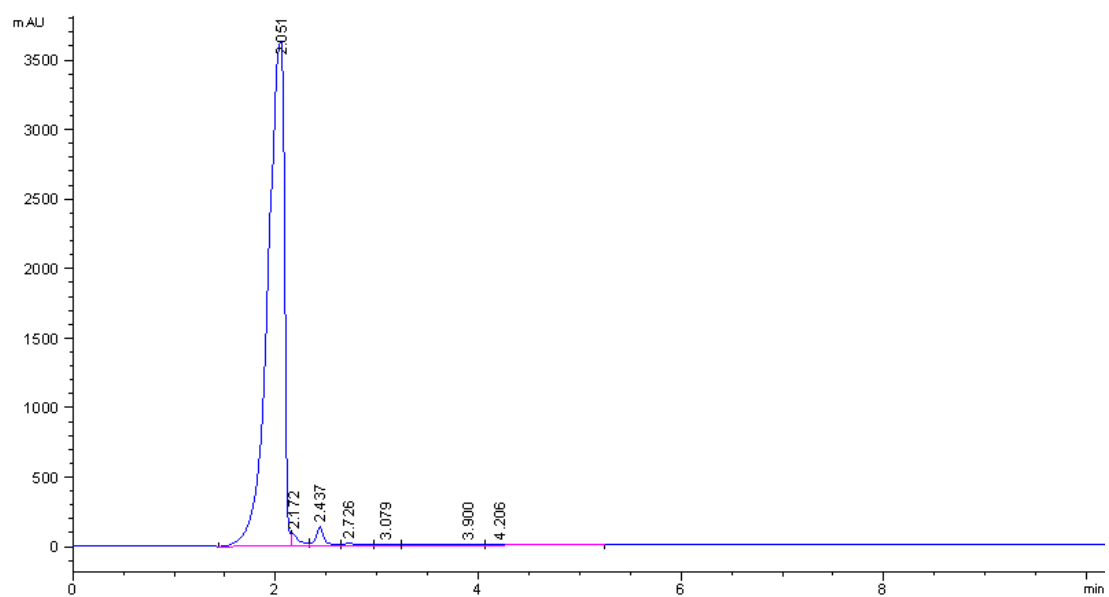

**Figure S11.** The HPCL results of complex **2**, the mobile phase is  $\text{CH}_3\text{OH}:\text{CH}_3\text{CN}=8:2$ .

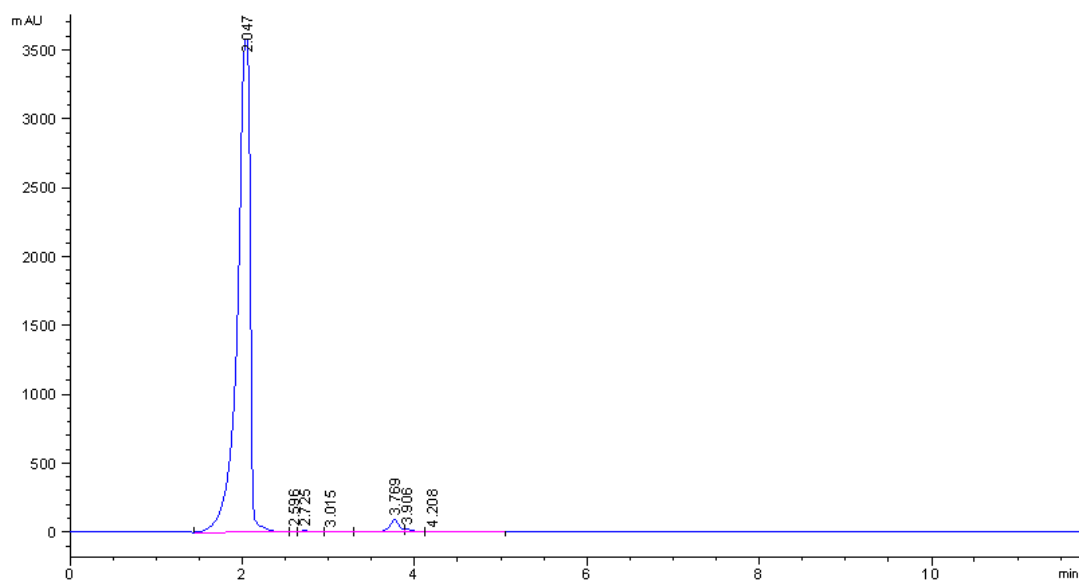

**Figure S12.** The HPCL results of complex **3**, the mobile phase is  $\text{CH}_3\text{OH}:\text{CH}_3\text{CN}=8:2$ .

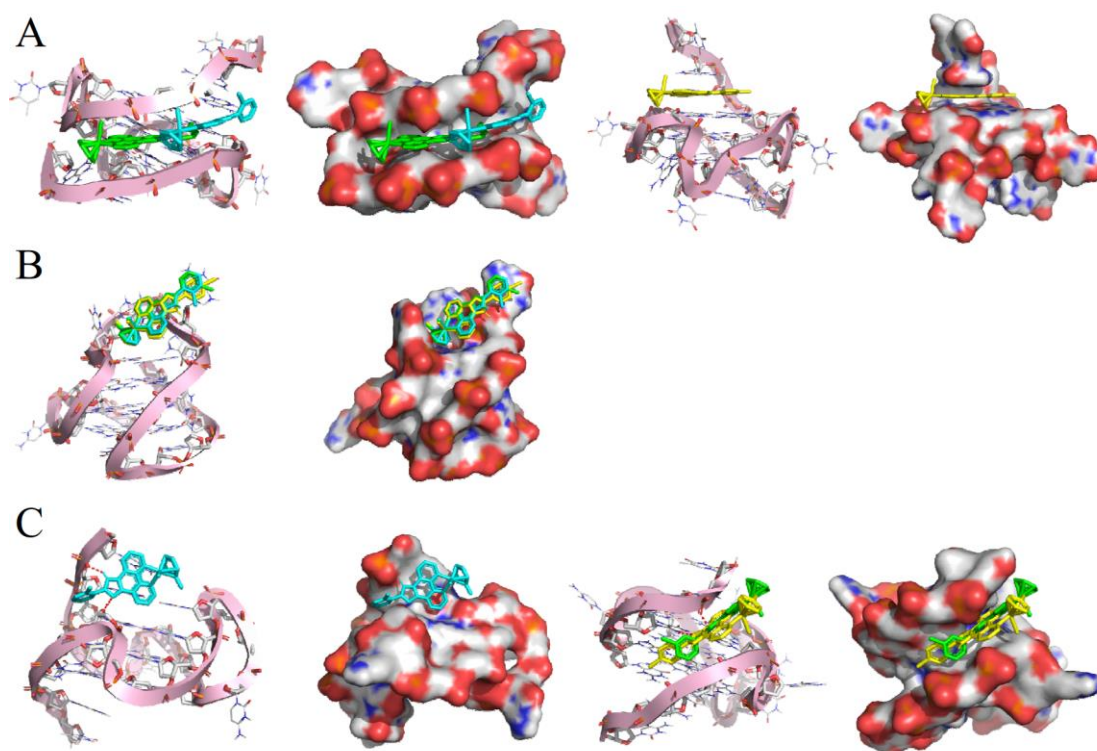

**Figure S13.** Binding site and mode of **1**(cyan), **2**(green), **3**(yellow) with c-myc (A), Bcl-2 (B) and VEGF (C) G-quadruplex DNA calculated by molecular docking.

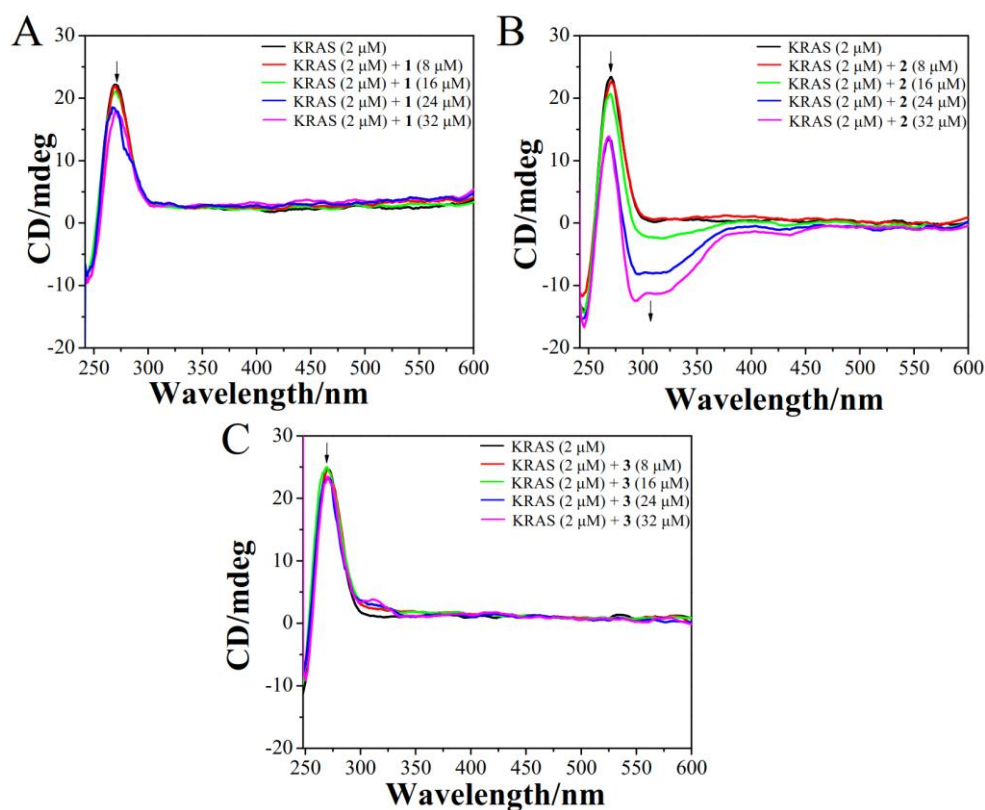

**Figure S14.** CD titration spectra of KRAS G-quadruplex DNA (2  $\mu\text{M}$ ) at different concentrations of **1** (A), **2** (B) and **3** (C) ([Ru] = 0, 8, 16, 24 and 32  $\mu\text{M}$ ) in the incubation buffer.

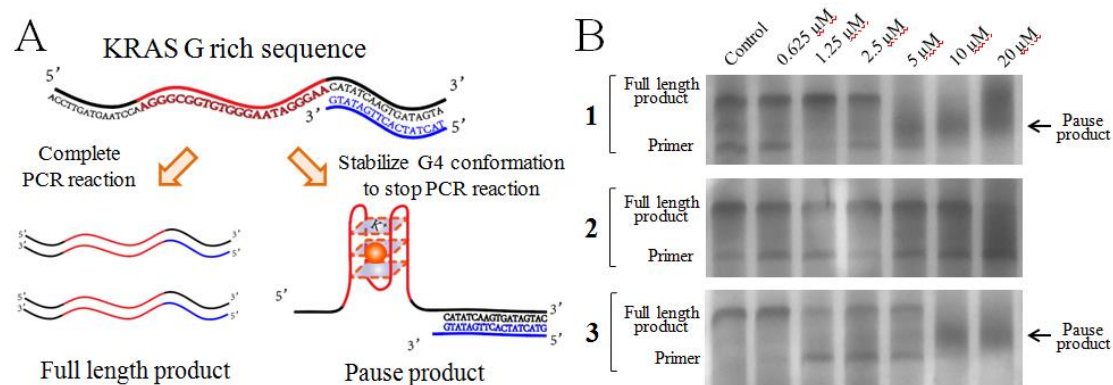

**Figure S15.** (A) The replication blocking of PCR products through stabilizing KRAS G-quadruplex DNA treated with arene Ru(II) complexes. (B) Effect of complexes **1**, **2** and **3** on the PCR-stop assay with KRAS G-quadruplex DNA.

[Ru] = 0, 0.625, 1.25, 2.5, 5, 10 and 20  $\mu$ M, [KRAS] = 10 pM.

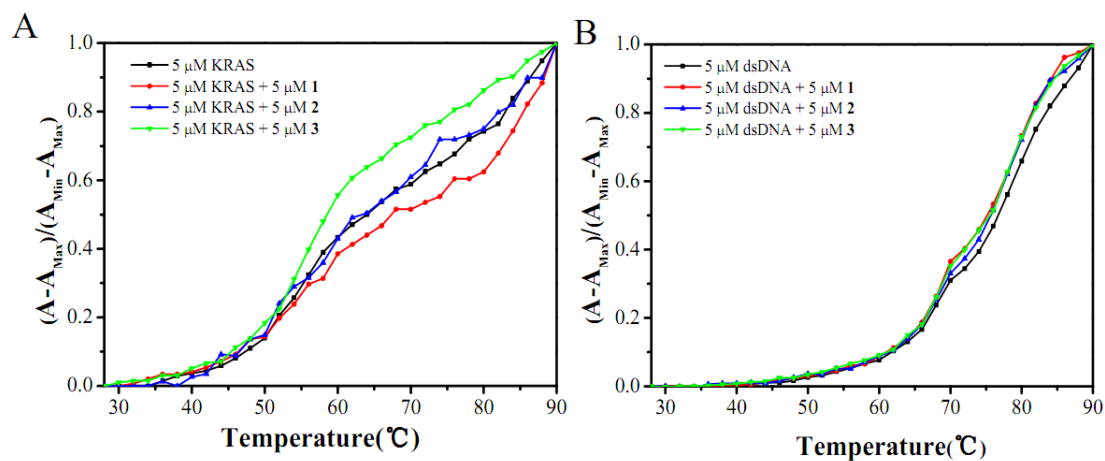

**Figure S16.** The stability of KRAS G-quadruplex DNA induced by arene ruthenium(II) complexes. (A) UV melting curves obtained with KRAS G-quadruplex DNA (5  $\mu$ M) free (■) upon addition of **1** (◆), **2** (▲) and **3** (▼). (B) UV melting curves obtained with dsDNA (5  $\mu$ M) free (■) upon addition of **1** (◆), **2** (▲) and **3** (▼). [Ru]= 5  $\mu$ M.
